# Supplementary material
Source: MDPI journal article supplement (https://www.mdpi.com/2813-4168/1/4/19)
Supplement: s1 [file s1]

## Supplementary Information

**Table S1.** 2022-adjusted mean 24-hour total PM<sub>2.5</sub> concentration by location and month.

| Monitoring Location                 | January   |     |     | February |     |      | March    |     |      | April    |     |      |
|-------------------------------------|-----------|-----|-----|----------|-----|------|----------|-----|------|----------|-----|------|
|                                     | Mean      | LCL | UCL | Mean     | LCL | UCL  | Mean     | LCL | UCL  | Mean     | LCL | UCL  |
| Arlington Municipal Airport         | 5.5       | 5.0 | 6.1 | 5.9      | 5.2 | 6.7  | 6.2      | 5.6 | 6.9  | 6.6      | 6.0 | 7.2  |
| Convention Center                   | 6.4       | 5.8 | 7.0 | 6.9      | 6.0 | 7.8  | 7.2      | 6.5 | 8.0  | 7.6      | 6.9 | 8.4  |
| Dallas Bexar Street                 | 6.4       | 5.5 | 7.4 | 6.9      | 5.8 | 8.1  | 7.2      | 6.2 | 8.4  | 7.6      | 6.6 | 8.8  |
| Dallas Hinton                       | 6.0       | 5.4 | 6.6 | 6.4      | 5.7 | 7.3  | 6.8      | 6.1 | 7.5  | 7.1      | 6.5 | 7.8  |
| Denton Airport South                | 5.2       | 4.7 | 5.7 | 5.6      | 4.9 | 6.4  | 5.9      | 5.3 | 6.5  | 6.2      | 5.6 | 6.8  |
| Fort Worth California Parkway North | 6.1       | 5.5 | 6.6 | 6.5      | 5.8 | 7.4  | 6.9      | 6.2 | 7.6  | 7.2      | 6.6 | 7.9  |
| Fort Worth Northwest                | 6.2       | 5.6 | 6.9 | 6.7      | 5.9 | 7.6  | 7.1      | 6.4 | 7.8  | 7.4      | 6.8 | 8.2  |
| Haws Athletic Center                | 6.0       | 5.5 | 6.6 | 6.5      | 5.7 | 7.4  | 6.8      | 6.2 | 7.5  | 7.2      | 6.5 | 7.9  |
| Italy                               | 5.4       | 4.9 | 5.9 | 5.8      | 5.1 | 6.6  | 6.1      | 5.5 | 6.7  | 6.4      | 5.8 | 7.0  |
| Kaufman                             | 5.0       | 4.5 | 5.5 | 5.4      | 4.8 | 6.1  | 5.7      | 5.1 | 6.3  | 6.0      | 5.4 | 6.6  |
| Midlothian OFW                      | 5.7       | 5.2 | 6.3 | 6.2      | 5.4 | 7.0  | 6.5      | 5.8 | 7.1  | 6.8      | 6.2 | 7.5  |
| Monitoring Location                 | May       |     |     | June     |     |      | July     |     |      | August   |     |      |
|                                     | Mean      | LCL | UCL | Mean     | LCL | UCL  | Mean     | LCL | UCL  | Mean     | LCL | UCL  |
| Arlington Municipal Airport         | 6.7       | 5.9 | 7.6 | 8.2      | 7.3 | 9.4  | 9.6      | 8.5 | 10.8 | 8.4      | 7.4 | 9.6  |
| Convention Center                   | 7.8       | 6.9 | 8.8 | 9.5      | 8.4 | 10.9 | 11.1     | 9.8 | 12.5 | 9.8      | 8.5 | 11.2 |
| Dallas Bexar Street                 | 7.8       | 6.6 | 9.2 | 9.6      | 7.9 | 11.6 | 11.1     | 9.5 | 13.1 | 9.8      | 8.1 | 11.9 |
| Dallas Hinton                       | 7.3       | 6.4 | 8.2 | 8.9      | 7.9 | 10.1 | 10.4     | 9.2 | 11.7 | 9.1      | 8.0 | 10.5 |
| Denton Airport South                | 6.3       | 5.6 | 7.2 | 7.8      | 6.9 | 8.8  | 9.0      | 8.0 | 10.2 | 8.0      | 7.0 | 9.1  |
| Fort Worth California Parkway North | 7.4       | 6.6 | 8.3 | 9.1      | 8.0 | 10.3 | 10.5     | 9.4 | 11.8 | 9.3      | 8.2 | 10.6 |
| Fort Worth Northwest                | 7.6       | 6.8 | 8.6 | 9.4      | 8.3 | 10.6 | 10.9     | 9.6 | 12.2 | 9.6      | 8.3 | 11.0 |
| Haws Athletic Center                | 7.4       | 6.5 | 8.3 | 9.0      | 8.0 | 10.2 | 10.5     | 9.3 | 11.8 | 9.2      | 8.1 | 10.6 |
| Italy                               | 6.5       | 5.8 | 7.4 | 8.0      | 7.1 | 9.1  | 9.3      | 8.3 | 10.5 | 8.2      | 7.2 | 9.4  |
| Kaufman                             | 6.1       | 5.4 | 6.9 | 7.5      | 6.6 | 8.5  | 8.7      | 7.7 | 9.8  | 7.7      | 6.7 | 8.8  |
| Midlothian OFW                      | 7.0       | 6.2 | 7.9 | 8.6      | 7.6 | 9.7  | 9.9      | 8.8 | 11.2 | 8.8      | 7.7 | 10.0 |
| Monitoring                          | September |     |     | October  |     |      | November |     |      | December |     |      |
|                                     | Mean      | LCL | UCL | Mean     | LCL | UCL  | Mean     | LCL | UCL  | Mean     | LCL | UCL  |

| Location                            |     |     |      |     |     |     |     |     |     |     |     |     |
|-------------------------------------|-----|-----|------|-----|-----|-----|-----|-----|-----|-----|-----|-----|
| Arlington Municipal Airport         | 7.4 | 6.6 | 8.2  | 5.8 | 5.2 | 6.5 | 5.7 | 5.0 | 6.5 | 6.1 | 5.4 | 6.8 |
| Convention Center                   | 8.5 | 7.7 | 9.5  | 6.8 | 6.0 | 7.6 | 6.6 | 5.7 | 7.6 | 7.0 | 6.2 | 7.9 |
| Dallas Bexar Street                 | 8.6 | 7.3 | 10.0 | 6.8 | 5.8 | 8.0 | 6.6 | 5.6 | 7.9 | 7.0 | 6.0 | 8.3 |
| Dallas Hinton                       | 8.0 | 7.2 | 8.9  | 6.3 | 5.6 | 7.1 | 6.2 | 5.4 | 7.1 | 6.6 | 5.9 | 7.4 |
| Denton Airport South                | 7.0 | 6.3 | 7.7  | 5.5 | 4.9 | 6.2 | 5.4 | 4.7 | 6.2 | 5.7 | 5.1 | 6.4 |
| Fort Worth California Parkway North | 8.1 | 7.3 | 9.0  | 6.4 | 5.8 | 7.2 | 6.3 | 5.5 | 7.2 | 6.7 | 6.0 | 7.4 |
| Fort Worth Northwest                | 8.4 | 7.5 | 9.3  | 6.6 | 5.9 | 7.4 | 6.5 | 5.6 | 7.4 | 6.9 | 6.1 | 7.7 |
| Haws Athletic Center                | 8.1 | 7.3 | 8.9  | 6.4 | 5.7 | 7.1 | 6.2 | 5.5 | 7.1 | 6.6 | 5.9 | 7.4 |
| Italy                               | 7.2 | 6.5 | 8.0  | 5.7 | 5.1 | 6.4 | 5.6 | 4.8 | 6.4 | 5.9 | 5.3 | 6.6 |
| Kaufman                             | 6.7 | 6.0 | 7.5  | 5.3 | 4.7 | 6.0 | 5.2 | 4.5 | 5.9 | 5.5 | 4.9 | 6.2 |
| Midlothian OFW                      | 7.6 | 6.9 | 8.5  | 6.0 | 5.4 | 6.8 | 5.9 | 5.2 | 6.8 | 6.3 | 5.6 | 7.0 |

LCL = 95% Lower Confidence Limit

UCL = 95% Upper Confidence Limit

**Table S2.** Spearman correlation matrix of 24-hour total PM<sub>2.5</sub> concentrations in the Dallas CBSA

| Monitoring Location                 | Arlington Municipal Airport | Convention Center | Dallas Bexar Street | Dallas Hinton | Denton Airport South | Fort Worth California Parkway North | Fort Worth Northwest | Haws Athletic Center | Italy | Kaufman | Midlothian OFW |
|-------------------------------------|-----------------------------|-------------------|---------------------|---------------|----------------------|-------------------------------------|----------------------|----------------------|-------|---------|----------------|
| Arlington Municipal Airport         | 1.00                        |                   |                     |               |                      |                                     |                      |                      |       |         |                |
| Convention Center                   | 0.83                        | 1.00              |                     |               |                      |                                     |                      |                      |       |         |                |
| Dallas Bexar Street                 | NA <sup>1</sup>             | 0.90              | 1.00                |               |                      |                                     |                      |                      |       |         |                |
| Dallas Hinton                       | 0.86                        | 0.91              | 0.81                | 1.00          |                      |                                     |                      |                      |       |         |                |
| Denton Airport South                | 0.87                        | 0.81              | 0.80                | 0.79          | 1.00                 |                                     |                      |                      |       |         |                |
| Fort Worth California Parkway North | 0.88                        | 0.89              | 0.80                | 0.84          | 0.86                 | 1.00                                |                      |                      |       |         |                |
| Fort Worth Northwest                | 0.86                        | 0.86              | 0.80                | 0.82          | 0.82                 | 0.90                                | 1.00                 |                      |       |         |                |
| Haws Athletic Center                | 0.84                        | 0.84              | 0.82                | 0.82          | 0.83                 | 0.90                                | 0.88                 | 1.00                 |       |         |                |
| Italy                               | 0.89                        | 0.81              | NA <sup>1</sup>     | 0.82          | 0.86                 | 0.85                                | 0.85                 | 0.83                 | 1.00  |         |                |
| Kaufman                             | 0.86                        | 0.82              | 0.82                | 0.78          | 0.83                 | 0.78                                | 0.73                 | 0.77                 | 0.92  | 1.00    |                |
| Midlothian OFW                      | 0.87                        | 0.79              | 0.85                | 0.79          | 0.80                 | 0.78                                | 0.74                 | 0.80                 | 0.91  | 0.83    | 1.00           |

<sup>1</sup> There was no temporal overlap between these monitoring locations.

**Table S3.** Raw IDW Average Background Dallas CBSA 24-hour PM<sub>2.5</sub> summary statistics (µg/m<sup>3</sup>)

| Monitoring Location                 | 25 <sup>th</sup><br>Percentile | Median | Mean | 75 <sup>th</sup><br>Percentile | Maximum | Mean<br>Difference <sup>1</sup> |
|-------------------------------------|--------------------------------|--------|------|--------------------------------|---------|---------------------------------|
| Arlington Municipal Airport         | 6.1                            | 8.0    | 8.8  | 10.4                           | 34.8    | 0.4                             |
| Convention Center                   | 6.0                            | 8.0    | 8.9  | 10.8                           | 47.3    | -0.6                            |
| Dallas Bexar Street                 | 5.8                            | 8.3    | 8.9  | 10.0                           | 34.1    | -0.7                            |
| Dallas Hinton                       | 5.9                            | 7.8    | 8.5  | 10.2                           | 47.3    | -0.5                            |
| Denton Airport South                | 6.0                            | 7.9    | 8.7  | 10.4                           | 48.0    | 0.9                             |
| Fort Worth California Parkway North | 6.0                            | 7.8    | 8.6  | 10.4                           | 50.0    | -0.1                            |
| Fort Worth Northwest                | 5.9                            | 7.9    | 8.7  | 10.6                           | 50.9    | -0.3                            |
| Haws Athletic Center                | 6.0                            | 7.9    | 8.7  | 10.5                           | 49.0    | -0.2                            |
| Italy                               | 6.0                            | 8.0    | 8.7  | 10.6                           | 32.3    | 0.4                             |
| Kaufman                             | 5.9                            | 7.9    | 8.7  | 10.4                           | 49.4    | 1.1                             |
| Midlothian OFW                      | 5.8                            | 7.8    | 8.5  | 10.3                           | 48.3    | 0.2                             |

<sup>1</sup> Difference calculated as follows: Difference = Regional – Local. This difference represents the mean difference between a monitoring location's measurement and the inverse distance weighted average at the surrounding monitoring locations. A positive value means that the concentrations at the surrounding monitor locations are on average greater than the concentrations at the monitoring location. A negative value means that the concentrations at the surrounding monitor locations are on average less than the concentrations at the monitoring location.

**Table S4.** 2022-adjusted mean 24-hour local PM<sub>2.5</sub> contributions by location and month.

| Monitoring Location                 | January   |     |     | February |     |     | March    |     |     | April    |     |     |
|-------------------------------------|-----------|-----|-----|----------|-----|-----|----------|-----|-----|----------|-----|-----|
|                                     | Mean      | LCL | UCL | Mean     | LCL | UCL | Mean     | LCL | UCL | Mean     | LCL | UCL |
| Arlington Municipal Airport         | 2.8       | 2.6 | 3.0 | 2.8      | 2.6 | 3.1 | 2.9      | 2.7 | 3.1 | 3.0      | 2.8 | 3.3 |
| Convention Center                   | 3.6       | 3.2 | 4.1 | 3.7      | 3.2 | 4.2 | 3.8      | 3.4 | 4.3 | 3.9      | 3.5 | 4.5 |
| Dallas Bexar Street                 | 3.4       | 3.0 | 3.9 | 3.5      | 3.0 | 3.9 | 3.6      | 3.2 | 4.0 | 3.7      | 3.3 | 4.2 |
| Dallas Hinton                       | 3.0       | 2.8 | 3.3 | 3.1      | 2.8 | 3.4 | 3.2      | 2.9 | 3.5 | 3.3      | 3.0 | 3.6 |
| Denton Airport South                | 2.6       | 2.4 | 2.8 | 2.7      | 2.4 | 2.9 | 2.7      | 2.6 | 3.0 | 2.9      | 2.6 | 3.1 |
| Fort Worth California Parkway North | 3.1       | 2.8 | 3.4 | 3.1      | 2.8 | 3.5 | 3.2      | 2.9 | 3.6 | 3.4      | 3.0 | 3.7 |
| Fort Worth Northwest                | 3.3       | 3.0 | 3.6 | 3.4      | 3.0 | 3.7 | 3.5      | 3.2 | 3.8 | 3.6      | 3.3 | 4.0 |
| Haws Athletic Center                | 3.2       | 3.0 | 3.5 | 3.3      | 3.0 | 3.6 | 3.4      | 3.2 | 3.6 | 3.5      | 3.3 | 3.8 |
| Italy                               | 2.8       | 2.6 | 3.0 | 2.8      | 2.6 | 3.1 | 2.9      | 2.7 | 3.2 | 3.0      | 2.8 | 3.3 |
| Kaufman                             | 2.6       | 2.4 | 2.8 | 2.6      | 2.4 | 2.8 | 2.7      | 2.5 | 2.9 | 2.8      | 2.6 | 3.1 |
| Midlothian OFW                      | 3.2       | 3.1 | 3.5 | 3.3      | 3.1 | 3.5 | 3.4      | 3.2 | 3.6 | 3.5      | 3.3 | 3.8 |
| Monitoring Location                 | May       |     |     | June     |     |     | July     |     |     | August   |     |     |
|                                     | Mean      | LCL | UCL | Mean     | LCL | UCL | Mean     | LCL | UCL | Mean     | LCL | UCL |
| Arlington Municipal Airport         | 3.0       | 2.8 | 3.2 | 3.1      | 2.9 | 3.4 | 3.2      | 2.9 | 3.4 | 3.1      | 2.9 | 3.4 |
| Convention Center                   | 3.9       | 3.5 | 4.4 | 4.0      | 3.6 | 4.6 | 4.1      | 3.6 | 4.7 | 4.1      | 3.6 | 4.7 |
| Dallas Bexar Street                 | 3.7       | 3.2 | 4.2 | 3.8      | 3.4 | 4.3 | 3.9      | 3.3 | 4.5 | 3.8      | 3.3 | 4.4 |
| Dallas Hinton                       | 3.3       | 3.0 | 3.6 | 3.4      | 3.1 | 3.7 | 3.4      | 3.1 | 3.8 | 3.4      | 3.1 | 3.8 |
| Denton Airport South                | 2.8       | 2.6 | 3.1 | 2.9      | 2.7 | 3.2 | 3.0      | 2.7 | 3.3 | 3.0      | 2.7 | 3.2 |
| Fort Worth California Parkway North | 3.3       | 3.0 | 3.7 | 3.4      | 3.1 | 3.8 | 3.5      | 3.1 | 3.9 | 3.5      | 3.1 | 3.9 |
| Fort Worth Northwest                | 3.6       | 3.2 | 3.9 | 3.7      | 3.3 | 4.1 | 3.7      | 3.3 | 4.2 | 3.7      | 3.3 | 4.2 |
| Haws Athletic Center                | 3.5       | 3.2 | 3.8 | 3.6      | 3.3 | 3.9 | 3.7      | 3.4 | 4.0 | 3.6      | 3.4 | 4.0 |
| Italy                               | 3.0       | 2.8 | 3.3 | 3.1      | 2.8 | 3.4 | 3.2      | 2.9 | 3.5 | 3.1      | 2.9 | 3.4 |
| Kaufman                             | 2.8       | 2.6 | 3.0 | 2.9      | 2.7 | 3.1 | 2.9      | 2.7 | 3.2 | 2.9      | 2.7 | 3.2 |
| Midlothian OFW                      | 3.5       | 3.3 | 3.7 | 3.6      | 3.4 | 3.9 | 3.7      | 3.4 | 4.0 | 3.7      | 3.4 | 3.9 |
| Monitoring Location                 | September |     |     | October  |     |     | November |     |     | December |     |     |
|                                     | Mean      | LCL | UCL | Mean     | LCL | UCL | Mean     | LCL | UCL | Mean     | LCL | UCL |
| Arlington Municipal Airport         | 3.1       | 2.9 | 3.4 | 2.9      | 2.7 | 3.1 | 2.9      | 2.7 | 3.1 | 2.9      | 2.7 | 3.2 |
| Convention Center                   | 4.1       | 3.6 | 4.6 | 3.7      | 3.3 | 4.2 | 3.8      | 3.3 | 4.3 | 3.8      | 3.4 | 4.3 |

|                                        |     |     |     |     |     |     |     |     |     |     |     |     |
|----------------------------------------|-----|-----|-----|-----|-----|-----|-----|-----|-----|-----|-----|-----|
| Dallas Bexar Street                    | 3.8 | 3.4 | 4.4 | 3.5 | 3.1 | 4.0 | 3.6 | 3.1 | 4.0 | 3.6 | 3.2 | 4.1 |
| Dallas Hinton                          | 3.4 | 3.1 | 3.7 | 3.1 | 2.9 | 3.4 | 3.2 | 2.9 | 3.5 | 3.2 | 2.9 | 3.5 |
| Denton Airport South                   | 2.9 | 2.7 | 3.2 | 2.7 | 2.5 | 2.9 | 2.7 | 2.5 | 3.0 | 2.8 | 2.5 | 3.0 |
| Fort Worth California Parkway<br>North | 3.5 | 3.1 | 3.9 | 3.2 | 2.9 | 3.5 | 3.2 | 2.9 | 3.6 | 3.3 | 2.9 | 3.6 |
| Fort Worth Northwest                   | 3.7 | 3.3 | 4.1 | 3.4 | 3.1 | 3.7 | 3.4 | 3.1 | 3.8 | 3.5 | 3.2 | 3.8 |
| Haws Athletic Center                   | 3.6 | 3.3 | 3.9 | 3.3 | 3.1 | 3.6 | 3.4 | 3.1 | 3.6 | 3.4 | 3.1 | 3.7 |
| Italy                                  | 3.1 | 2.9 | 3.4 | 2.9 | 2.6 | 3.1 | 2.9 | 2.6 | 3.2 | 2.9 | 2.7 | 3.2 |
| Kaufman                                | 2.9 | 2.7 | 3.2 | 2.7 | 2.5 | 2.9 | 2.7 | 2.5 | 2.9 | 2.7 | 2.5 | 3.0 |
| Midlothian OFW                         | 3.6 | 3.4 | 3.9 | 3.3 | 3.1 | 3.6 | 3.4 | 3.1 | 3.6 | 3.4 | 3.2 | 3.7 |

LCL = 95% Lower Confidence Limit

UCL = 95% Upper Confidence Limit

**Table S5.** Mean local PM<sub>2.5</sub> attribution proportions by location and month

| <b>Monitoring Location</b>          | <b>January</b>   | <b>February</b> | <b>March</b>    | <b>April</b>    |
|-------------------------------------|------------------|-----------------|-----------------|-----------------|
| Arlington Municipal Airport         | 0.51             | 0.48            | 0.47            | 0.46            |
| Convention Center                   | 0.57             | 0.53            | 0.53            | 0.52            |
| Dallas Bexar Street                 | 0.54             | 0.50            | 0.49            | 0.49            |
| Dallas Hinton                       | 0.51             | 0.48            | 0.47            | 0.46            |
| Denton Airport South                | 0.51             | 0.47            | 0.47            | 0.46            |
| Fort Worth California Parkway North | 0.51             | 0.48            | 0.47            | 0.47            |
| Fort Worth Northwest                | 0.53             | 0.50            | 0.49            | 0.48            |
| Haws Athletic Center                | 0.54             | 0.50            | 0.50            | 0.49            |
| Italy                               | 0.52             | 0.49            | 0.48            | 0.47            |
| Kaufman                             | 0.52             | 0.49            | 0.48            | 0.47            |
| Midlothian OFW                      | 0.57             | 0.53            | 0.53            | 0.52            |
| <b>Monitoring Location</b>          | <b>May</b>       | <b>June</b>     | <b>July</b>     | <b>August</b>   |
| Arlington Municipal Airport         | 0.45             | 0.38            | 0.33            | 0.37            |
| Convention Center                   | 0.50             | 0.42            | 0.37            | 0.42            |
| Dallas Bexar Street                 | 0.47             | 0.40            | 0.35            | 0.39            |
| Dallas Hinton                       | 0.45             | 0.38            | 0.33            | 0.37            |
| Denton Airport South                | 0.45             | 0.38            | 0.33            | 0.37            |
| Fort Worth California Parkway North | 0.45             | 0.38            | 0.33            | 0.37            |
| Fort Worth Northwest                | 0.47             | 0.39            | 0.34            | 0.39            |
| Haws Athletic Center                | 0.47             | 0.40            | 0.35            | 0.39            |
| Italy                               | 0.46             | 0.39            | 0.34            | 0.38            |
| Kaufman                             | 0.46             | 0.38            | 0.34            | 0.38            |
| Midlothian OFW                      | 0.50             | 0.42            | 0.37            | 0.42            |
| <b>Monitoring Location</b>          | <b>September</b> | <b>October</b>  | <b>November</b> | <b>December</b> |
| Arlington Municipal Airport         | 0.42             | 0.49            | 0.51            | 0.48            |
| Convention Center                   | 0.48             | 0.55            | 0.57            | 0.54            |
| Dallas Bexar Street                 | 0.45             | 0.52            | 0.54            | 0.51            |
| Dallas Hinton                       | 0.42             | 0.49            | 0.51            | 0.48            |
| Denton Airport South                | 0.42             | 0.49            | 0.51            | 0.48            |
| Fort Worth California Parkway North | 0.43             | 0.50            | 0.51            | 0.49            |
| Fort Worth Northwest                | 0.44             | 0.51            | 0.53            | 0.51            |
| Haws Athletic Center                | 0.45             | 0.52            | 0.54            | 0.51            |

|                |      |      |      |      |
|----------------|------|------|------|------|
| Italy          | 0.43 | 0.50 | 0.52 | 0.50 |
| Kaufman        | 0.43 | 0.50 | 0.52 | 0.49 |
| Midlothian OFW | 0.48 | 0.55 | 0.57 | 0.54 |

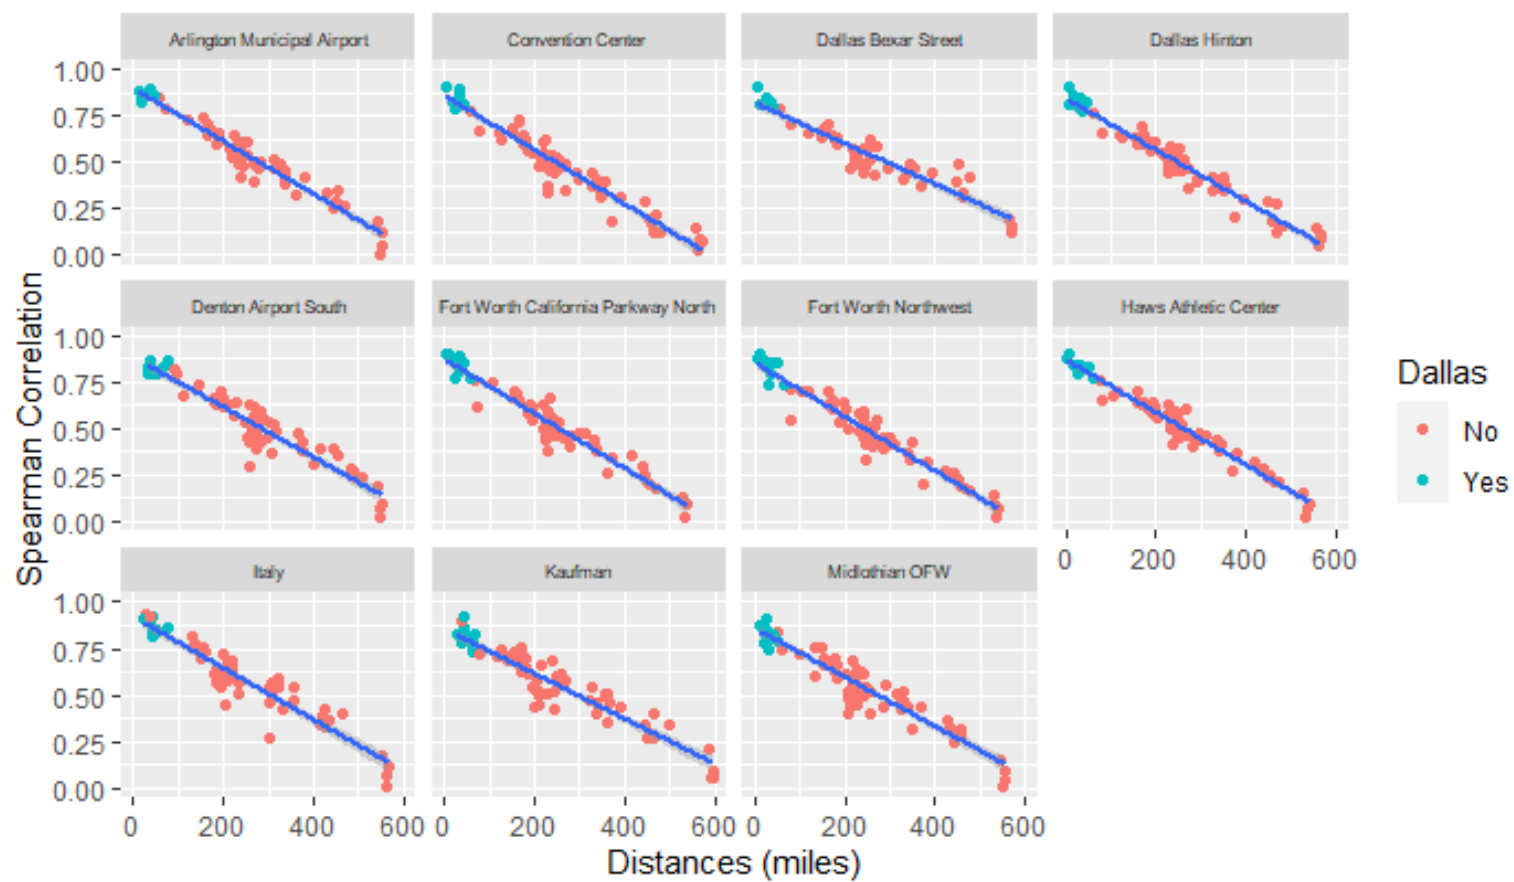

**Figure S1.** Pairwise Spearman correlations between Dallas monitoring locations and other Texas monitoring locations.
